# Supplementary material for: Insights into the origin of Co-based bimetallic catalysts with a para-structure exhibiting ORR and OER bifunctional activities
Source: Royal Society of Chemistry journal article supplement (doi:10.1039/d4qi00793j), 2024-01-01
Supplement: d4qi00793j2.pdf [file d4qi00793j2.pdf]

# Insights into the origin of Co-based bimetallic catalysts with para-structure exhibiting ORR and OER bifunctional activity

Yuxi Zhu<sup>a</sup>, Chaoling Han<sup>a,c</sup>, Zhenqian Chen<sup>a,b,\*</sup>

<sup>a</sup> School of Energy and Environment, Southeast University, Nanjing 210096, China

<sup>b</sup> Jiangsu Provincial Key Laboratory of Solar Energy Science and Technology, Nanjing 210096, China

<sup>c</sup> College of Emergency Management, Nanjing Tech University, Nanjing 211816, China

---

\*Corresponding author.

*E-mail address:* zqchen@seu.edu.cn (Z. Chen)

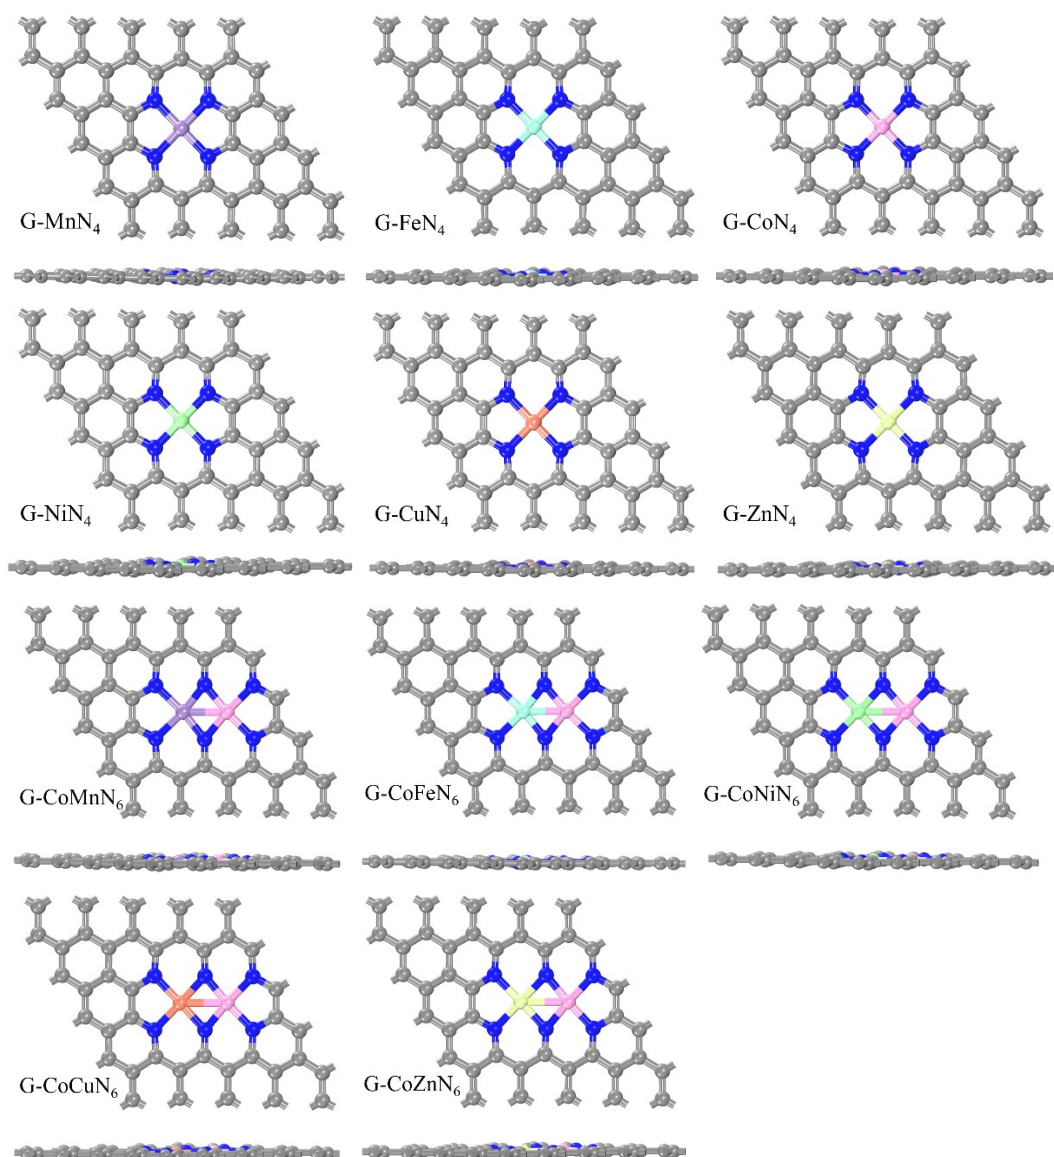

**Fig. S1.** The structures of single metal atom catalysts and bimetallic catalyst after optimization.

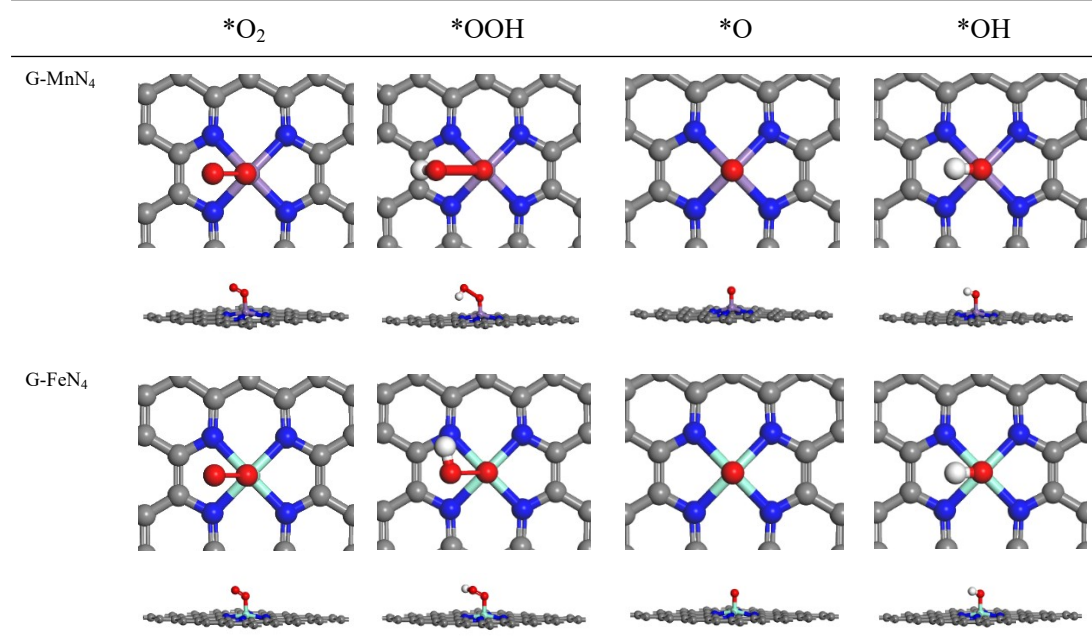

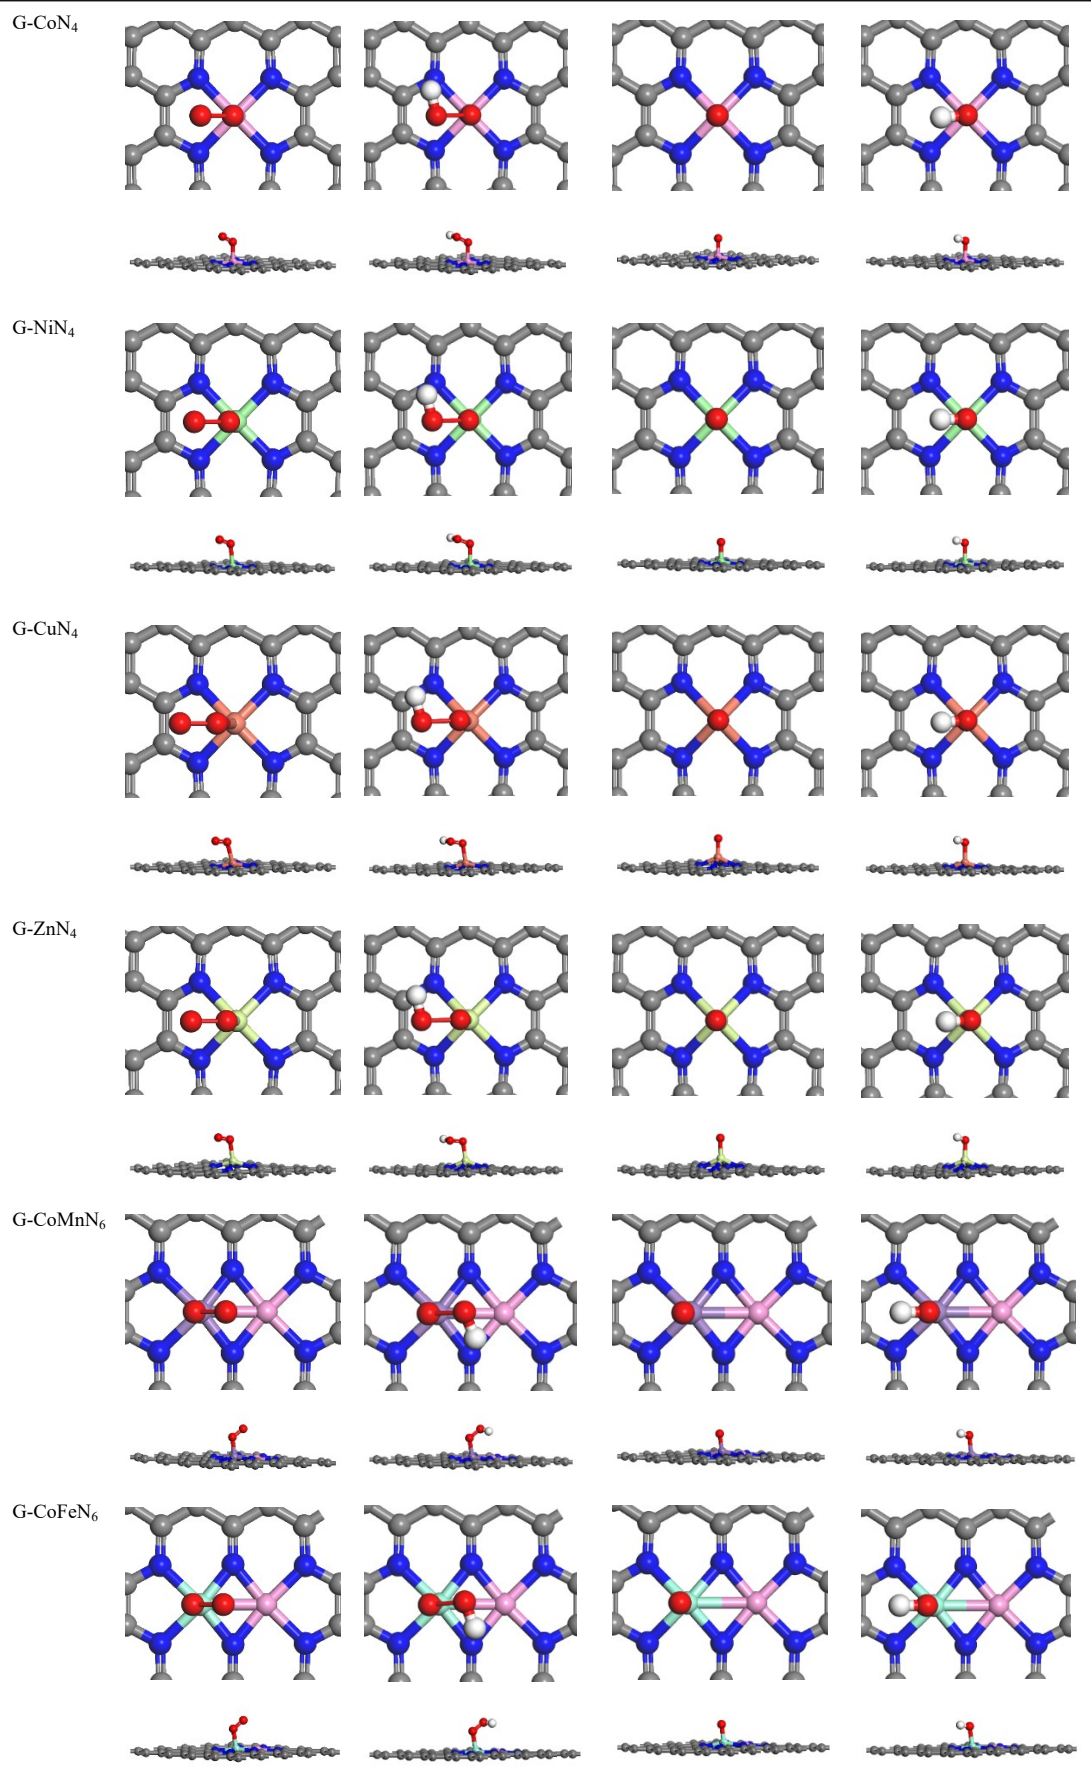

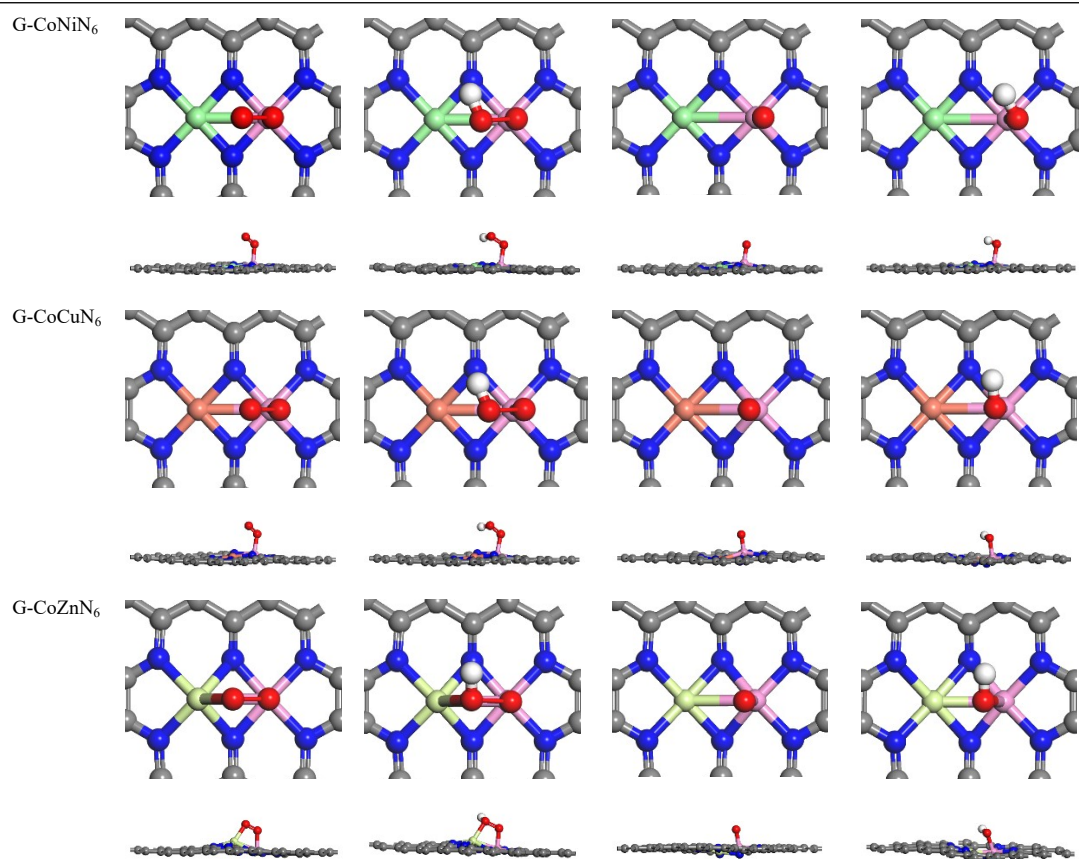

**Fig. S2.** Adsorption configurations of various oxygen-containing species on single metal atom catalysts and Co-based bimetallic catalysts.

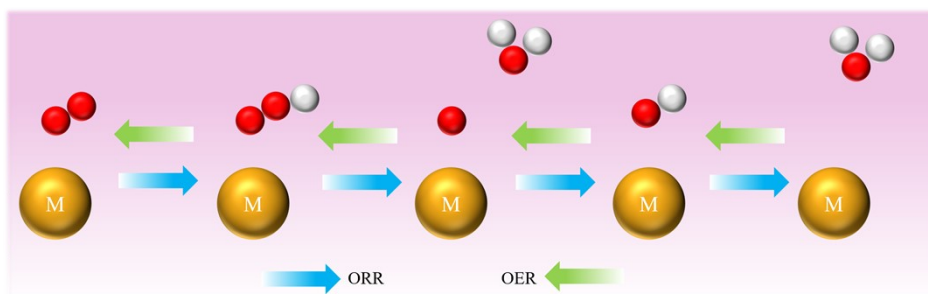

**Fig. S3.** Four-electron reaction of ORR and OER in acidic media.
